# Supplementary material for: Critical evaluation of current isolation, detection, and genotyping methods of Cryptosporidium species and future direction
Source: Royal Society of Chemistry journal article supplement (doi:10.1039/d3ew00469d), 2024-01-01
Supplement: d3ew00469d1.pdf [file d3ew00469d1.pdf]

## **Critical evaluation of current isolation, detection, and genotyping methods of *Cryptosporidium* species and future direction**

Rabbee G. Mahmudunnabi <sup>a,b</sup>, Surasak Kasetsirikul <sup>a</sup>, Narshone Soda<sup>a</sup>, Mohamed Sallam <sup>a,b,c</sup>,  
Amandeep Singh Pannu <sup>a</sup>, Nam-Trung Nguyen<sup>a</sup>, Helen Stratton <sup>\*a,b</sup>, Muhammad J. A.  
Shiddiky <sup>\*c</sup>

<sup>a</sup> Queensland Micro- and Nanotechnology Centre (QMNC), Griffith University, Nathan  
Campus, Nathan, QLD 4111, Australia

<sup>b</sup> School of Environment and Science (ESC), Griffith University, Nathan Campus, Nathan,  
QLD 4111, Australia

<sup>c</sup> Griffith Institute for Drug Discovery (GRIDD), Griffith University, Nathan Campus,  
Nathan, QLD 4111, Australia

<sup>d</sup> Rural Health Research Institute, Charles Stuart University, Orange, NSW 2800, Australia

\* Corresponding Authors: [h.stratton@griffith.edu.au](mailto:h.stratton@griffith.edu.au) (HS), [mshiddiky@csu.edu.au](mailto:mshiddiky@csu.edu.au) (MJAS)

**Table S1: Comparison of different filtration approaches**

| Filtration type/materials of membrane                                                                                  | Water type analysed                                 | Volume of sample | Enrichment and detection                                               | Average recovery                                                                              | Observation/Comment                                                                                                                                            | Ref   |
|------------------------------------------------------------------------------------------------------------------------|-----------------------------------------------------|------------------|------------------------------------------------------------------------|-----------------------------------------------------------------------------------------------|----------------------------------------------------------------------------------------------------------------------------------------------------------------|-------|
| Filta Max by IDEXX                                                                                                     | Seeded treated and raw water                        | 10L<br>100L      | <ul style="list-style-type: none"> <li>• IMS</li> <li>• IFA</li> </ul> | 19.6 – 28.2%(1)<br>72.6%(2,3)                                                                 | <ul style="list-style-type: none"> <li>• Depending on the water quality recovery varied.</li> </ul>                                                            | 1–3   |
| Envirochek HV                                                                                                          | Seeded tap and surface water                        | 10L – 100L       | <ul style="list-style-type: none"> <li>• IMS</li> <li>• IFA</li> </ul> | 51–70%                                                                                        | <ul style="list-style-type: none"> <li>• Depending on the water quality recovery varied.</li> </ul>                                                            | 1,3,4 |
| Size-selective continuous flow filtration<br>Filter pairs used for filtration ((5µm, 3 µm), (8µm, 3 µm), (10µm, 3 µm)) | <i>C. parvum</i> oocysts spiked into finished water | 20L              | <ul style="list-style-type: none"> <li>• IMS</li> <li>• IFA</li> </ul> | (5µm, 3 µm) pair = 67.3%,<br>(8µm, 3 µm) pair = 77.2–85.0%,<br>(10µm, 3 µm) pair = 76.9–82.2% | <ul style="list-style-type: none"> <li>• Simple, rapid and cost-effective</li> </ul>                                                                           | 5     |
| Dead-end ultrafiltration (DEUF)                                                                                        | Seeded lake water                                   | 100L             | <ul style="list-style-type: none"> <li>• IMS</li> <li>• IFA</li> </ul> | 49 – 87%                                                                                      | <ul style="list-style-type: none"> <li>• High turbidity decreases the recovery.</li> </ul>                                                                     | 6,7   |
| High-flux metallic micro/nano-filtration membrane                                                                      | Spiked tap-water                                    | 10L              | <ul style="list-style-type: none"> <li>• IMS</li> <li>• IFA</li> </ul> | 85%,                                                                                          | <ul style="list-style-type: none"> <li>• a long lifetime</li> <li>• Easily cleanable</li> </ul>                                                                | 8     |
| Counter-Flow Micro-Refinery (CFMR) systems                                                                             | Spiked surface water                                | 10L – 100L       | <ul style="list-style-type: none"> <li>• IMS</li> <li>• IFA</li> </ul> | 81.3%,                                                                                        | <ul style="list-style-type: none"> <li>• No significant clogging has been observed</li> </ul>                                                                  | 9     |
| Portable continuous flow centrifugation (PCFC)                                                                         | Spiked water with various matrices                  | 10L – 100L       | <ul style="list-style-type: none"> <li>• IMS</li> <li>• IFA</li> </ul> | 35% – 66.8%                                                                                   | <ul style="list-style-type: none"> <li>• User-friendly, clogging -free concentration.</li> <li>• Recovery drops if when more water volume increases</li> </ul> | 10    |

**Table S2: Comparison of different molecular detection techniques/studies reported for *Cryptosporidium* spp. detection.**

| Techniques/study | Gene target, primers, and probes (5'→3')                                                                                                                                                  | Sample analyzed                                                                                                                                                                                                                                                           | LOD | Results/Comments                                                                                                                                                                                                                                                                                                                                                                                                                                                    | Ref |
|------------------|-------------------------------------------------------------------------------------------------------------------------------------------------------------------------------------------|---------------------------------------------------------------------------------------------------------------------------------------------------------------------------------------------------------------------------------------------------------------------------|-----|---------------------------------------------------------------------------------------------------------------------------------------------------------------------------------------------------------------------------------------------------------------------------------------------------------------------------------------------------------------------------------------------------------------------------------------------------------------------|-----|
| FISH             | Target: 18S rRNA<br>> CRY1 probe<br>TRITC/CGGTTATCCATGTAAGTAAAG/CY3                                                                                                                       | Along with <i>C. baileyi</i> and <i>C. muris</i> , 19 different isolates of <i>C. parvum</i> were tested to check CRY1 probe specificity.<br><br>10 to 20 L samples concentrated by flocculation, 100µL of this concentrate was seeded with different numbers of oocysts. | NA  | <ul style="list-style-type: none"> <li>• No fluorescence was observed for <i>C. baileyi</i> and <i>C. muris</i>.</li> <li>• CRY1 probe is <i>C. parvum</i>-specific.</li> <li>• Viability assessment of 100 oocysts (6 replicates) by FISH and excystation corroborated each other.</li> <li>• Fluorescent was not bright enough in environmental concentrate, however, in combination with immunofluorescence staining FISH was able to detect oocysts.</li> </ul> | 11  |
| FISH             | Target: 18S rRNA<br>> EUK probe <sup>12</sup> (targets 18S rRNA of Eukarya)<br>FITC/ACCAGACTTGCCCTCC<br><br>> ANTI-EUK probe (for measuring nonspecific fluorescence)<br>GGAGGGCAAGTCTGGT | Used pre-confirmed <i>C. parvum</i> oocysts sample                                                                                                                                                                                                                        | NA  | <ul style="list-style-type: none"> <li>• Optimized a rapid (&lt;1.0 hour) FISH protocol.</li> <li>• Kinetics of probe binding to rRNA</li> <li>• Calculated 18S rRNA molecules (<math>3.5 \times 10^5</math>) per oocysts.</li> <li>• Concluded that fluorescent signal cannot be achieved beyond what was achieved by Vesey et al.(11)</li> </ul>                                                                                                                  | 13  |

|                                    |                                                                                                                                                                                                                                                                           |                                                                                                                                                                        |            |                                                                                                                                                                                                                                                                                                                                                                                                                                                                                                                                       |    |
|------------------------------------|---------------------------------------------------------------------------------------------------------------------------------------------------------------------------------------------------------------------------------------------------------------------------|------------------------------------------------------------------------------------------------------------------------------------------------------------------------|------------|---------------------------------------------------------------------------------------------------------------------------------------------------------------------------------------------------------------------------------------------------------------------------------------------------------------------------------------------------------------------------------------------------------------------------------------------------------------------------------------------------------------------------------------|----|
| FISH                               | <p>Target: 18S rRNA<br/> &gt; CRY1 probe<sup>11</sup><br/> CGGTTATCCATGTAAGTAAAG</p> <p>&gt; EUK probe<sup>12</sup><br/> ACCAGACTTGCCCTCC</p> <p>&gt; ANTI-EUK probe (13)<br/> GGAGGGCAAGTCTGGT</p>                                                                       | Purified <i>C. parvum</i> oocysts                                                                                                                                      | NA         | <ul style="list-style-type: none"> <li>Probes were conjugated with a range of fluorophores (FITC, FAM, BD, OG, CY3)</li> <li>Observed a five-fold increase in fluorescence when CRY1 probes carry FITC with an 18-carbon spacer containing six ethylene glycol moieties.</li> <li>FISH-based flow cytometric detection.</li> </ul>                                                                                                                                                                                                    | 14 |
| FISH                               | <p>Target: 18S rRNA<br/> &gt; Cpar677 probe (specific for <i>C. parvum</i>)<br/> Cy3/TCATATACTAAAATATATAGTATATAT</p> <p>Sequence alignment of 18S rRNA genes from <i>Cryptosporidium</i> spp. for designing Cpar677 probe, which binds one of the 4 variable regions.</p> | 33 human fecal samples                                                                                                                                                 | NA         | <ul style="list-style-type: none"> <li>8 different <i>Cryptosporidium</i> species such as <i>C. parvum</i>, <i>C. hominis</i>, <i>C. andersoni</i>, <i>C. muris</i>, <i>C. meleagridis</i>, <i>C. felis</i>, <i>C. cervine genotype</i> and <i>C. rabbit genotype</i> oocysts were tested.</li> <li>Only <i>C. parvum</i> showed positive fluorescence.</li> <li>Feecal sample tested by FISH-Cpar677, detected <i>C. parvum</i>, validated by PCR-RFLP</li> </ul>                                                                    | 15 |
| FISH-based fluorescence microscopy | <p>Target: 18S rRNA gene<br/> &gt;Cpar677 probe (specific for <i>C. parvum</i>) (15)<br/> Cy3/TCATATACTAAAATATATAGTATATAT</p> <p>&gt; Chom253 probe (specific for <i>C. hominis</i>)<br/> FITC/TCACATTAATTGTGATCC</p>                                                     | <p>Different ratio of <i>C. parvum</i> to <i>C. hominis</i> (10:90 to 90:10).</p> <p>Pre-confirmed 50 human fecal samples positive for <i>Cryptosporidium</i> spp.</p> | 10 oocysts | <ul style="list-style-type: none"> <li>Two color assays for simultaneous detection of <i>C. parvum</i> and <i>C. hominis</i></li> <li>Chrom253 was validated against <i>C. parvum</i>, <i>C. hominis</i>, <i>C. andersoni</i>, <i>C. muris</i>, <i>C. meleagridis</i>, <i>C. felis</i>, <i>C. cervine genotype</i> and <i>C. rabbit genotype</i>.</li> <li>Chrom253 cross reacts with <i>C. rabbit genotype</i> due to being 100% sequence homology in target region.</li> <li>FISH positive results validated by PCR-RFLP</li> </ul> | 16 |

|                                                                  |                                                                                                                                                                                                                                                                                                          |                                                                                                                                                                             |                                         |                                                                                                                                                                                                                                                                                                                                                                     |    |
|------------------------------------------------------------------|----------------------------------------------------------------------------------------------------------------------------------------------------------------------------------------------------------------------------------------------------------------------------------------------------------|-----------------------------------------------------------------------------------------------------------------------------------------------------------------------------|-----------------------------------------|---------------------------------------------------------------------------------------------------------------------------------------------------------------------------------------------------------------------------------------------------------------------------------------------------------------------------------------------------------------------|----|
| RT-PCR for in vitro infectivity assay                            | <p>Target: <i>hsp 70</i> mRNA<br/>For all <i>Cryptosporidium</i> spp.</p> <p>&gt; CpHSP2386F<br/>CTGTTGCTTATGGTGCTGCTG<br/>&gt; CpHSP2672R<br/>CCTCTTGGTGCTGGTGGGAATA</p> <p>For <i>C. parvum</i> specific<br/>&gt; CpHSP2423F<br/>AAATGGTGAGCAATCCTCTG<br/>&gt; CpHSP2764R<br/>CTTGCTGCTCTTACCAGTAC</p> | <p>Purified <i>C. parvum</i> oocysts</p> <p>65 to 100 liters of concentrated environmental water samples seeded with 1-10 oocysts.</p>                                      | <p>A single <i>C. parvum</i> oocyst</p> | <ul style="list-style-type: none"> <li>mRNA isolated from sporozoite infected cacao-2 cell.</li> <li>Infection takes almost 4 days, and so does analysis.</li> </ul>                                                                                                                                                                                                | 17 |
| In vitro cell culturing and PCR (CC-PCR) based infectivity assay | <p>Target: <i>hsp 70</i> mRNA<br/>For <i>C. parvum</i> specific primers (17)</p> <p>&gt; CpHSP2423F<br/>AAATGGTGAGCAATCCTCTG<br/>&gt; CpHSP2764R<br/>CTTGCTGCTCTTACCAGTAC</p>                                                                                                                            | <p>122 raw water and 121 filter backwash water samples, 10L each.</p> <p>Seeded with viable <i>C. parvum</i> oocysts for recovery analysis by IMS-IFA and flotation-IFA</p> | NA                                      | <ul style="list-style-type: none"> <li>Human ileocecal adenocarcinoma (HCT-8, ATCC) cell line was used for CC-PCR assay.</li> <li>Optimized oocysts dissociation after IMS (with 0.1N HCl)</li> <li>Due to the small volume recovered after IMS compared to floatation, is generally amenable for CC-PCR.</li> <li>CC-PCR results were comparable to IFA</li> </ul> | 18 |
| Comparison of USEPA 1623 and CC-PCR                              | <p>Target: <i>hsp 70 gene</i><br/>For PCR</p> <p>&gt; CPHSPT2F (forward primer)<br/>TCCTCTGCCGTACAGGATCTCTTA<br/>&gt; CPHSPT2R (reverse primer)<br/>TGCTGCTCTTACCAGTACTCTTATCA</p>                                                                                                                       | <p>593 water samples were collected from flowing streams, reservoirs and lakes of different locations in the USA.</p>                                                       | NA                                      | <ul style="list-style-type: none"> <li>Comparison was performed to evaluate the performance of <i>Cryptosporidium</i> oocyst detection.</li> <li>Recovery efficiencies were 58.5% and 72% for CC-PCR and method 1623, respectively.</li> <li>3.9% of samples were detected by CC-</li> </ul>                                                                        | 19 |

|                                                                                    |                                                                                                                                                                                                                                                                                                                                                                                  |                                                                                                                         |                                                                                            |                                                                                                                                                                                                                                                                                                                                                                                                                                                                           |    |
|------------------------------------------------------------------------------------|----------------------------------------------------------------------------------------------------------------------------------------------------------------------------------------------------------------------------------------------------------------------------------------------------------------------------------------------------------------------------------|-------------------------------------------------------------------------------------------------------------------------|--------------------------------------------------------------------------------------------|---------------------------------------------------------------------------------------------------------------------------------------------------------------------------------------------------------------------------------------------------------------------------------------------------------------------------------------------------------------------------------------------------------------------------------------------------------------------------|----|
|                                                                                    |                                                                                                                                                                                                                                                                                                                                                                                  |                                                                                                                         |                                                                                            | <p>PCR whereas 10.1% were by method 1623.</p> <ul style="list-style-type: none"> <li>• Method 1623 detects both viable and non-viable while CC-PCR detects viable one.</li> </ul>                                                                                                                                                                                                                                                                                         |    |
| <p>Comparison of CC-IFA, CC-PCR, and CC-RT-PCR for in vitro infectivity assay</p>  | <p>Target: hsp70 gene and hsp70 mRNA</p> <p>For PCR<sup>19</sup></p> <p>&gt; CPHSPT2F (forward primer)<br/>TCCTCTGCCGTACAGGATCTCTTA</p> <p>&gt; CPHSPT2R (reverse primer)<br/>TGCTGCTCTTACCAGTACTCTTATCA</p> <p>For RT-PCR<sup>17</sup></p> <p>For <i>C. parvum</i> specific</p> <p>&gt; CpHSP2423F<br/>AAATGGTGAGCAATCCTCTG</p> <p>&gt; CpHSP2764R<br/>CTTGCTGCTCTTACCAGTAC</p> | <p><i>C. parvum</i> and <i>C. hominis</i> purified oocysts.</p> <p>Treated drinking water (10L) spiked with oocysts</p> | <p>A single oocyst by each method</p>                                                      | <ul style="list-style-type: none"> <li>• HCT-8 cell line was used for in-vitro infection for IFA, PCR, and RT-PCR</li> <li>• Sensitivity order: CC-PCR &gt; CC-IFA &gt; CC-RT-PCR</li> <li>• False-positive in mock infection: CC-PCR &gt; CC-RT-PCR &gt; CC-IFA (0 false-positive)</li> <li>• Spiked water was processed according to USEPA method 1623, and CC-IFA detected all samples tested. False-negative observed in the case of CC-PCR and CC-RT-PCR.</li> </ul> | 20 |
| <p>PCR and evaluation of six DNA isolation methods and effect of PCR inhibitor</p> | <p>Target: 18S rRNA gene</p> <p>Primers for <i>Cryptosporidium</i> spp.<sup>21</sup></p> <p>&gt; Forward primer<br/>AACCTGGTTGATCCTGCCAGTAGTC</p> <p>&gt; Reverse primer</p> <p>Product length: ~ 820 bp</p>                                                                                                                                                                     | <p><i>Cryptosporidium</i> oocyst-seeded samples, DNA-spiked samples, and 55 wastewater samples.</p>                     | <p>5 oocysts (extraction of DNA by QIAamp DNA mini kit after oocyst isolation by IMS.)</p> | <ul style="list-style-type: none"> <li>• PCR inhibition removal can be done by adding 400 ng of BSA/μL or 25 ng of T4 gene 32 protein/μL of the PCR reaction.</li> <li>• PCR performance was similar for extracted DNA with FastDNA SPIN kit for soil without oocyst isolation QIAamp DNA mini kit after oocysts were purified by IMS</li> </ul>                                                                                                                          | 22 |

|                                                            |                                                                                                                                                                                                                                                                                                                                                                                                                                                                                                                                                                                                                             |                                                                                                                                                                            |                                                            |                                                                                                                                                                                                                                                                                                                                                                                                                                                                   |    |
|------------------------------------------------------------|-----------------------------------------------------------------------------------------------------------------------------------------------------------------------------------------------------------------------------------------------------------------------------------------------------------------------------------------------------------------------------------------------------------------------------------------------------------------------------------------------------------------------------------------------------------------------------------------------------------------------------|----------------------------------------------------------------------------------------------------------------------------------------------------------------------------|------------------------------------------------------------|-------------------------------------------------------------------------------------------------------------------------------------------------------------------------------------------------------------------------------------------------------------------------------------------------------------------------------------------------------------------------------------------------------------------------------------------------------------------|----|
| Nested-PCR                                                 | <p>Target: 18S rRNA gene</p> <p>Inner primers<sup>23</sup></p> <p>&gt; Forward primer<br/>TTCTAGAGCTAATACATGCG</p> <p>&gt; Reverse primer<br/>CCCTAATCCTTCGAAACAGGA</p> <p>Product length: ~826 bp</p>                                                                                                                                                                                                                                                                                                                                                                                                                      | Wastewater from bus terminals, airports and wastewater treatment plants (WWTP)                                                                                             | NA                                                         | <ul style="list-style-type: none"> <li>• Epidemiology study</li> <li>• Reported the presence of <i>C. cuniculus</i> in wastewater in São Paulo, Brazil, and Lima, Peru for the first time.</li> </ul>                                                                                                                                                                                                                                                             | 24 |
| Nested-PCR assay and RT-PCR with internal positive control | <p>Target: hsp70 gene and hsp70 mRNA</p> <p>Primers for RT-PCR internal positive control (IPC)<sup>25</sup></p> <p>&gt; IPCF<br/>ATGACAGCCACTCCT</p> <p>&gt;IPCR ATGTCAGTTGTGACCACGAA</p> <p>Primers for nested-PCR internal positive control (IPC2)</p> <p>&gt; chsp1ipc<br/>AGCAATCCTCTGCCGTACAGGATGACAGCC</p> <p>&gt; chsp4ipc<br/>AAGAGCATCCTTGATCTTCTATGTCAGTTG</p> <p>Nested PCR primers</p> <p>Outer primers<sup>26</sup></p> <p>&gt; CHSP1<br/>AGCAATCCTCTGCCGTACAGG</p> <p>&gt;CHSP4 AAGAGCATCCTTGATCTTCT</p> <p>Product length: 590 bp</p> <p>Inner primers</p> <p>&gt; CPHSP2511<br/>ATGACCAAGCTTATTGAAC-3')</p> | <p>Finished water and untreated surface water.</p> <p>10<sup>4</sup> or 8 <i>C. parvum</i> oocysts spiked into 1mL reagent water containing 10L equivalent concentrate</p> | <p>8 oocysts by nested PCR.</p> <p>5 oocysts by RT-PCR</p> | <ul style="list-style-type: none"> <li>• Nested-PCR an RT-PCR had similar sensitivity (8 versus 5 oocysts); however, nested-PCR was observed to be more reproducible.</li> <li>• Untreated water has inhibitory effect on when processed with flocculation whereas processing the samples with Envirochek filters effective to remove inhibitors.</li> <li>• This study counter verified the primers and results of Kaucner <i>et al.</i><sup>25</sup></li> </ul> | 27 |

|                       |                                                                                                                                                                                                                                                                                                                                                                                                                                                                                                                                                                                                                                                                                                                 |                                                                                                                                                                                                   |                                                                                                         |                                                                                                                                                                                                                                                                                                                                                                                                                                                                                                                                                                                                                                                                                               |    |
|-----------------------|-----------------------------------------------------------------------------------------------------------------------------------------------------------------------------------------------------------------------------------------------------------------------------------------------------------------------------------------------------------------------------------------------------------------------------------------------------------------------------------------------------------------------------------------------------------------------------------------------------------------------------------------------------------------------------------------------------------------|---------------------------------------------------------------------------------------------------------------------------------------------------------------------------------------------------|---------------------------------------------------------------------------------------------------------|-----------------------------------------------------------------------------------------------------------------------------------------------------------------------------------------------------------------------------------------------------------------------------------------------------------------------------------------------------------------------------------------------------------------------------------------------------------------------------------------------------------------------------------------------------------------------------------------------------------------------------------------------------------------------------------------------|----|
|                       | <p>&gt; CPHSP2769<br/>GTGATCTTGCTGCTCTTACCA<br/>Product length: 280 bp</p> <p>RT-PCR primers<br/>CHSP1/CHSP4 used for RT-PCR.</p>                                                                                                                                                                                                                                                                                                                                                                                                                                                                                                                                                                               |                                                                                                                                                                                                   |                                                                                                         |                                                                                                                                                                                                                                                                                                                                                                                                                                                                                                                                                                                                                                                                                               |    |
| TaqMan MGB-qPCR assay | <p>Target: 18S rRNA gene<br/>Generic TaqMan assay for <i>Cryptosporidium</i> spp.<br/>&gt; CcF18S (forward primer)<br/>GTTTTTCATTAATCAAGAACGAAAGT TAGG<br/>&gt; CcR18S (reverse primer)<br/>GAGTAAGGAACAACCTCCAATCTCT AG<br/>&gt; Csp18S (generic probe)<br/>FAM/TCAGATACCGTCGTAGTCTTAA CCATAAACTATGCC/TAMRA<br/>Product length: ~107bp.<br/>Specific TaqMan MGB assays<br/>&gt; ChvF18S (forward primer)<br/>CAATAGCGTATATTAAGTTGTTGC AGTT<br/>&gt; ChvR18S (reverse primer)<br/>CTGCTTTAAGCACTCTAATTTTCTCAA<br/>&gt; Cp/Ch18S (probe for <i>C. parvum</i>/<i>C. hominis</i>)<br/>FAM/GTTAATAATTTATATAAAATAT TTTGATG/NFQ-MGB<br/>&gt; Ca18S (probe for <i>C. andersoni</i>)<br/>FAM/CCAAGGTAATTATTATATTATC</p> | <p>Four surface water samples (40 L) from a dam and spiked <i>C. parvum</i> oocysts at a concentration of 1, 5 and 25 oocysts L<sup>-1</sup></p> <p>Samples were processed with Envirochek HV</p> | <p>1 oocyst per reaction</p> <p>Detected 5 oocysts L<sup>-1</sup> concentration from spiked sample.</p> | <ul style="list-style-type: none"> <li>Multiple sequence alignment was done for the 18S rRNA gene from 21 <i>Cryptosporidium</i> spp. to design a generic assay. Specific probes were designed targeting the hypervariable region from the same alignment.</li> <li>External amplification control to monitor amplification false negative due to inhibition.</li> <li>Specificity was tested against 11 <i>Cryptosporidium</i> species.</li> <li>Specific assay probed to be unaffected by high amount of non-target DNA.</li> <li>Collected samples had naturally occurring <i>C. andersoni</i> which was detected along with spiked <i>C. parvum</i> oocysts by specific assay.</li> </ul> | 28 |



|                         |                                                                                                                                                                                                                                                        |                                                                                                                                                                                                                                     |                                                                                                |                                                                                                                                                                                                                                                                                                                                                                                                                                                                                                                                                             |    |
|-------------------------|--------------------------------------------------------------------------------------------------------------------------------------------------------------------------------------------------------------------------------------------------------|-------------------------------------------------------------------------------------------------------------------------------------------------------------------------------------------------------------------------------------|------------------------------------------------------------------------------------------------|-------------------------------------------------------------------------------------------------------------------------------------------------------------------------------------------------------------------------------------------------------------------------------------------------------------------------------------------------------------------------------------------------------------------------------------------------------------------------------------------------------------------------------------------------------------|----|
|                         | <p>/NFQ-MGB<br/> &gt; Cb18S (probe for <i>C. bovis</i>)<br/> NED/AAAAGCTCGTAGTTAATCTTCT<br/> GTTA/NFQ-MGB</p> <p>Product length: ~170bp</p>                                                                                                            |                                                                                                                                                                                                                                     |                                                                                                |                                                                                                                                                                                                                                                                                                                                                                                                                                                                                                                                                             |    |
| TaqMan probe-based qPCR | <p>Target: COWP gene<br/> &gt;Forward primer<br/> CAAATTGATACCGTTTGTCTTCTG<br/> &gt;Reverse primer<br/> GGCATGTCGATTCTAATTCAGCT<br/> &gt; Probe<br/> HEX/TGCCATACATTGTTGTCCTGAC<br/> AAATTGAAT/BHQ-1</p> <p>Product length: 151 bp</p>                 | <p>Water sample from pond, river, lake. Samples(2L) were vacuum filtered with cellulose nitrate filters (pore size: 3-µm, diameter: 47-mm)</p> <p>Raw sewage water(1L), processed through centrifugation at 30 min at 3,000 × g</p> | 4 copies of the COWP gene (equivalent to 1 oocyst)                                             | <ul style="list-style-type: none"> <li>• 26 precursor COWP gene sequence from different strains of <i>Cryptosporidium</i> was aligned to design primers for <i>C. parvum</i> genotypes 1(anthroponotic) and genotype 2(zoonotic)</li> <li>• DNeasy (Qiagen) DNA extraction modified with 3 cycles freeze-thaw and sonication increased DNA yield by two- to fivefold</li> <li>• PCR inhibition was observed in sewage sample.</li> <li>• Addition of 20% Chelex 100 along with 2% PVP 360 during DNA extraction successfully removed inhibition.</li> </ul> | 29 |
| TaqMan MGB-qPCR assay   | <p>Target: 18S rRNA gene</p> <p>For <i>Cryptosporidium</i> spp.<br/> &gt; CRU18SFc (forward primer)<br/> GAGGTAGTGACAAGAAATAACAAT<br/> ACAGG<br/> &gt;CRU18SRc (reverse primer)<br/> CTGCTTTAAGCACTCTAATTTTCTCA<br/> AAG<br/> &gt; CRU18STM(probe)</p> | Human fecal samples                                                                                                                                                                                                                 | 2 oocysts per PCR reaction (calculated from the number of oocysts seeded/gram of stool and DNA | <ul style="list-style-type: none"> <li>• 136 positive stool sample were typed by this assay and PCR-RFLP for COWP for <i>C. hominis</i> and <i>C. parvum</i>.</li> <li>• Both the techniques type almost same number of <i>C. parvum</i> or <i>C. hominis</i>, 129 and 128 for TaqMan and COWP-RFLP assay.</li> <li>• Given that different gene and primer sets were used by COWP-PCR and TaqMan assay, TaqMan assay happened to be</li> </ul>                                                                                                              | 30 |

|                                          |                                                                                                                                                                                                                                                                                                                                                                                                                                                                                                                                                                                                      |                                                                                                                                    |                                                                   |                                                                                                                                                                                                                                                                                                                                                                                      |    |
|------------------------------------------|------------------------------------------------------------------------------------------------------------------------------------------------------------------------------------------------------------------------------------------------------------------------------------------------------------------------------------------------------------------------------------------------------------------------------------------------------------------------------------------------------------------------------------------------------------------------------------------------------|------------------------------------------------------------------------------------------------------------------------------------|-------------------------------------------------------------------|--------------------------------------------------------------------------------------------------------------------------------------------------------------------------------------------------------------------------------------------------------------------------------------------------------------------------------------------------------------------------------------|----|
|                                          | <p>FAM/TACGAGCTTTTTAACTGCAACA<br/>A/MGB-NFQ<br/>Product length: ~300 bp</p> <p>For <i>C. parvum</i><br/>&gt; CRULib13F (forward primer)<br/>TCCTTGAAATGAATATTTGTGACTC<br/>G<br/>&gt; CRULib13RCp (reverse primer)<br/>TTAATGTGGTAGTTGCGGTTGAAC<br/>&gt; CRULib13TMCp(probe)<br/>VIC/TATCTCTTCGTAGCGGCGTA/MG<br/>B-NFQ<br/>Product length: 166 bp</p> <p>For <i>C. hominis</i><br/>&gt;CRULib13F (forward primer)<br/>(as above)<br/>&gt; CRULib13RCh (reverse primer)<br/>AAATGTGGTAGTTGCGGTTGAAA<br/>&gt;CRULib13TMCh(probe)<br/>VIC/CTTACTTCGTGGCGGCGT/MGB-<br/>NFQ<br/>Product length: 169 bp</p> |                                                                                                                                    | final<br>extraction<br>volume)                                    | more sensitive and specific.                                                                                                                                                                                                                                                                                                                                                         |    |
| FRET<br>probe-<br>based<br>qPCR<br>assay | <p>For details about primers and probes, refer to the reference number.</p> <p>Primers were designed for 3 assays. Two based on 18S rRNA gene (18S-LC1 and 18S-LC2 assays) and 3<sup>rd</sup> one targeted hsp90.</p>                                                                                                                                                                                                                                                                                                                                                                                | Analytical performances were determined by <i>C. parvum</i> seeded human fecal specimens (as low as 10 oocysts) and 10L lake water | 0.2-2 oocysts/PCR and 0.1-1 oocysts/PCR in spiked feces and water | <ul style="list-style-type: none"> <li>• All three assays produced distinct melt curves depending on the probes, product length and polymorphism present in the targeted region of 18S rRNA and <i>hsp</i> 90 genes.</li> <li>• For sensitive FRET analysis Mg<sup>2+</sup> concentration was crucial.</li> <li>• Successfully differentiated <i>C. parvum</i>, <i>C.</i></li> </ul> | 31 |

|                                                         |                                                                                                                                                                                                                                                                                                  |                                                                                                                   |                                                                                                                                 |                                                                                                                                                                                                                                                                                                                                                                                                                                                                                |    |
|---------------------------------------------------------|--------------------------------------------------------------------------------------------------------------------------------------------------------------------------------------------------------------------------------------------------------------------------------------------------|-------------------------------------------------------------------------------------------------------------------|---------------------------------------------------------------------------------------------------------------------------------|--------------------------------------------------------------------------------------------------------------------------------------------------------------------------------------------------------------------------------------------------------------------------------------------------------------------------------------------------------------------------------------------------------------------------------------------------------------------------------|----|
|                                                         |                                                                                                                                                                                                                                                                                                  | concentrates (as low as 10 oocysts)<br><br>Source water.                                                          | samples respectively depending on the primers and probes.                                                                       | <i>hominis</i> , <i>C. andersoni</i> , <i>C. ubiquitum</i> , <i>C. cuniculus</i> , <i>C. deer mouse genotype III</i> , <i>C. muskrat genotype I</i> , <i>C. skunk genotype</i>                                                                                                                                                                                                                                                                                                 |    |
| Comparison between droplet digital PCR (ddPCR) and qPCR | Target: 18S rRNA gene and actin gene<br><br>Primers for 18S rRNA gene <sup>32</sup><br>>18SiF (forward primer)<br>AGTGACAAGAAATAACAATACAGG<br>>18SiR (reverse primer)<br>CCTGCTTTAAGCACTCTAATTTTC<br>TaqMan probe <sup>33</sup><br>FAM/AAGTCTGGTGCCAGCAGCCGC/<br>BHQ1<br>Product length: ~298 bp | Purified <i>C. parvum</i> oocysts<br><br>Flow cytometry counted oocysts.<br><br>18 animal and human fecal samples | 2 and 2.5 oocyst equivalents for both ddPCR and qPCR (18S and actin locus) on haemocytometer and flow-cytometry counted oocysts | <ul style="list-style-type: none"> <li>• ddPCR is more precise and sensitive than qPCR and offers absolute quantification.</li> <li>• ddPCR is not affected by the PCR inhibitor present in the fecal sample.</li> <li>• While both offer similar sensitivity, however, qPCR data need to be corrected as general spectroscopic techniques overestimate the DNA standard.</li> <li>• Relative cost of 96 well plate ddPCR analysis is more than twice that of qPCR.</li> </ul> | 34 |
| Loop-mediated isothermal amplification (LAMP)           | Target: gp60 gene<br>Primers targeted the 189 bp segment.<br>> F3(forward primer)<br>TCGCACCAGCAAATAAGGC<br>> B3 (backward primer)<br>GCCGCATTCTTCTTTGGAG<br>> FIP (forward inner primer)<br>ACCCTGGCTACCAGAAGCTTCAGAA<br>CTGGAGACGCAGAA                                                         | Purified <i>C. parvum</i> oocysts.<br><br>Pre-confirmed (IFA positive) fecal and water samples for validation.    | 0.1 Oocysts (determined from the response of 7 fold serial dilution of DNA                                                      | <ul style="list-style-type: none"> <li>• First report of application of LAMP in Cryptosporidium detection.</li> <li>• LAMP detected Cryptosporidium from all fecal and environmental samples.</li> </ul>                                                                                                                                                                                                                                                                       | 35 |

|                                                         |                                                                                                                                                                                                                                                           |                                                                                                                                                 |                                               |                                                                                                                                                                                                                                                                                                                                                                                                                                                |    |
|---------------------------------------------------------|-----------------------------------------------------------------------------------------------------------------------------------------------------------------------------------------------------------------------------------------------------------|-------------------------------------------------------------------------------------------------------------------------------------------------|-----------------------------------------------|------------------------------------------------------------------------------------------------------------------------------------------------------------------------------------------------------------------------------------------------------------------------------------------------------------------------------------------------------------------------------------------------------------------------------------------------|----|
|                                                         | > BIP (backward inner primer)<br>GGCCAAACTAGTGCTGCTTCCCGTT<br>TCGGTAGTTGCGCCTT                                                                                                                                                                            |                                                                                                                                                 | isolated<br>from 10 <sup>6</sup> )<br>oocysts |                                                                                                                                                                                                                                                                                                                                                                                                                                                |    |
| Loop-mediated isothermal amplification (LAMP)           | Target: SAM-1, gp60, <i>hsp 70</i> gene<br><br>For the detailed list of primers, refer to the reference.<br><br>SAM and HSP LAMP primers included degenerate base at the position if multiple sequence alignment showed SNP at the primer binding region. | 270 fecal samples from cattle, sheep and horses                                                                                                 | NA                                            | <ul style="list-style-type: none"> <li>• Specificity:<br/>SAM LAMP for <i>C. parvum</i>, <i>C. hominis</i> and <i>C. meleagridis</i><br/>gp60 LAMP for <i>C. parvum</i><br/>hsp70 LAMP for <i>C. andersoni</i></li> <li>• Nested-PCR negative (18S rRNA gene) was amplified by LAMP and validated by cloning and sequencing of LAMP products, probably due to DNA concentration was below the detection limit or PCR was inhibited.</li> </ul> | 36 |
| Comparison of IFA, nested-PCR and LAMP in surface water | Target: SAM-1 gene (LAMP), 18S rRNA gene (nested PCR)<br><br>SAM-1 LAMP used the primers from Bakheit <i>et al.</i> <sup>36</sup><br><br>For nested PCR, primers were selected from Xiao <i>et al.</i> <sup>21,37</sup>                                   | Surface water from the river. At least 10L water was used for each data point.<br><br>filtrated by 142 mm membrane filters used for filtration. | NA                                            | <ul style="list-style-type: none"> <li>• According to this study sensitivity order in detecting oocysts from 20 environmental samples is:<br/>LAMP (45%) &gt; IFA (30%) &gt; nested-PCR (5%)</li> </ul>                                                                                                                                                                                                                                        | 38 |
| Comparison of IFA, nested-PCR                           | Target: SAM-1 gene (LAMP), 18S rRNA gene (nested PCR)<br><br>SAM-1 LAMP used the primers from Bakheit <i>et al.</i> <sup>36</sup>                                                                                                                         | 70 water samples, including tap, river, fountain and well water.                                                                                | NA                                            | <ul style="list-style-type: none"> <li>• According to this study sensitivity order in detecting oocysts from 70 water samples is<br/>LAMP (27.1%) &gt; IFA (25.7%) &gt; nested-PCR (0)</li> </ul>                                                                                                                                                                                                                                              | 39 |

|                                                             |                                                                                                                                                                                                                                                                                                                                                              |                                                                                                                                                                         |           |                                                                                                                                                                                                                                                                                                                                                                                                                                                                 |    |
|-------------------------------------------------------------|--------------------------------------------------------------------------------------------------------------------------------------------------------------------------------------------------------------------------------------------------------------------------------------------------------------------------------------------------------------|-------------------------------------------------------------------------------------------------------------------------------------------------------------------------|-----------|-----------------------------------------------------------------------------------------------------------------------------------------------------------------------------------------------------------------------------------------------------------------------------------------------------------------------------------------------------------------------------------------------------------------------------------------------------------------|----|
| and LAMP in surface water                                   | For nested-PCR, primers were selected from Xiao <i>et al.</i> <sup>21,37</sup>                                                                                                                                                                                                                                                                               | 16 river and tap water pellets were spiked with 10 oocysts.                                                                                                             |           | <ul style="list-style-type: none"> <li>100 percent spiked samples were positive for LAMP assay whereas 43.75% of samples were positive by nested PCR. As nested PCR has sensitivity down to single copy, in this case, suggesting the presence of inhibitor affected nested-PCR but not the LAMP assay.</li> </ul>                                                                                                                                              |    |
| Comparison of IFA, nested-PCR and LAMP in surface water     | <p>Target: SAM-1 gene (LAMP), 18S rRNA gene</p> <p>For the detailed list of primers, refer to the reference.</p>                                                                                                                                                                                                                                             | Effluent, influent from WWTPs processed by flocculation and sucrose centrifugation. Surface water, drinking water and tap water are processed by microfiber filtration. | NA        | <ul style="list-style-type: none"> <li>According to this study overall sensitivity order in detecting oocysts from 227 samples is LAMP (43.6%) &gt; PCR (41.9%) &gt; IFA (30.4)</li> <li>However, depending on the water sources, variation is observed. Such as, nested PCR produced a more positive response (45.5%) than LAMP (35.3%).</li> <li>Irrespective of the sample type, detection performance was consistently lower than the other two.</li> </ul> | 40 |
| Real-time nucleic acid sequence-based amplification (NASBA) | <p>Target: MIC1 mRNA</p> <p>Primers</p> <p>&gt; C.par MIC1 P2<br/>TCATATAAACCAGAATCAGTAGGA &gt;</p> <p>C.par MIC1 P1<br/>AATTCTAATACGACTCACTATAGGG<br/>AGGAAGCCAAGATGACCATT</p> <p>&gt; C.hom MIC1 P2<br/>GATGTGGAATCTACAGGATA</p> <p>&gt; C.hom MIC1 P1<br/>AATTCTAATACGACTCACTATAGGG<br/>CTATGACAAGGATAATATGGT</p> <p>Probes</p> <p>&gt; C.par MIC1 MB</p> | Serial dilution purified <i>C. parvum</i> and <i>C. hominis</i> oocysts to test the method's sensitivity and applicability for viability analysis.                      | 5 oocysts | <ul style="list-style-type: none"> <li>Originally assay was designed to distinguish oocysts and <i>C. parvum</i> and <i>C. hominis</i> and intent to have the viability information.</li> <li>The assay detected and differentiated both oocysts. It happened to be positive for both live and dead oocysts. Hence, hypothesized that mRNA remained protected even if in dead oocysts.</li> </ul>                                                               | 41 |

|                                               |                                                                                                                                                                                                                                                                                                                                                                |                                                                                                                                                               |    |                                                                                                                                                                                             |    |
|-----------------------------------------------|----------------------------------------------------------------------------------------------------------------------------------------------------------------------------------------------------------------------------------------------------------------------------------------------------------------------------------------------------------------|---------------------------------------------------------------------------------------------------------------------------------------------------------------|----|---------------------------------------------------------------------------------------------------------------------------------------------------------------------------------------------|----|
|                                               | FAM/CGCGATAGCAGGAGTGTATTC<br>AACTACAATCGCG/BHQ-1<br>> C.hom MIC1 MB<br>CAL_Fluor_610/CGCGATTGATGGATC<br>TTGACTTGGTAGTTATCGCG/BHQ2                                                                                                                                                                                                                              |                                                                                                                                                               |    |                                                                                                                                                                                             |    |
| Comparison of Sanger sequencing (SgS) and NGS | Target gene for sequencing: 18S rRNA gene and gp60<br><br>Nested-PCR was performed according to Xiao <i>et al.</i> <sup>21</sup> except CCCATTTCTTCGAAACAGGA was used as a reverse primer in primary PCR. Nested-PCR for gp60 was performed according to Sulaiman <i>et al.</i> <sup>42</sup>                                                                  | 101 <i>Cryptosporidium</i> -positive human fecal samples linked to swimming pool-associated cryptosporidiosis outbreaks in Western Australia in 2019 and 2020 | NA | <ul style="list-style-type: none"> <li>Co-infections/mixed infections were present in multiple samples, which was overlooked by SgS, however, identified by NGS.</li> </ul>                 | 43 |
| NGS for wastewater sample                     | Hypervariable V9 region of eukaryotic 18S(product length ~107bp) and a <i>Cryptosporidium</i> -specific 18S (product length ~ 298bp) were amplified by following primers:<br>For <i>Cryptosporidium</i> spp. <sup>32</sup><br>> 18S iF<br>AGTGACAAGAAATAACAATACAGG<br>> 18S iR<br>CCTGCTTTAAGCACTCTAATTTTC<br>For Eukaryotes<br>> Euk1391F<br>GTACACACCGCCCGTC | Wastewater sample WWTP                                                                                                                                        | NA | <ul style="list-style-type: none"> <li>Eukaryotic 18S was not sensitive to <i>Cryptosporidium</i> spp. detection by NGS.</li> <li>Suggested <i>Cryptosporidium</i>-specific NGS.</li> </ul> | 44 |

|  |                                                                                                                 |  |  |  |  |
|--|-----------------------------------------------------------------------------------------------------------------|--|--|--|--|
|  | > EukBr<br>TGATCCTTCTGCAGGTTACCTAC<br>> Mammalian blocking primer<br>CCCGTCGCTACTACCGATTGG44444T<br>TAGTGAGGCC3 |  |  |  |  |
|--|-----------------------------------------------------------------------------------------------------------------|--|--|--|--|

Waste Water Treatment Plant (WWTP), minor groove binder (MGB), black hole quencher 1 (BHQ1), non-fluorescent quencher (NFQ), molecular beacon (MB) fluorescein amidites (FAM), carboxytetramethylrhodamine (TAMRA)

**Table 3: Comparison of different biosensor-based approaches for *Cryptosporidium spp.* detection.**

| Techniques/study                                    | Sensor probes/target biomarkers                                                                       | Sample analysed                                                                               | Signal recorded/detection mode       | LOD (Normalised LOD/ $\mu$ L)             | Results/Comments                                                                                                                                                                                                     | Ref |
|-----------------------------------------------------|-------------------------------------------------------------------------------------------------------|-----------------------------------------------------------------------------------------------|--------------------------------------|-------------------------------------------|----------------------------------------------------------------------------------------------------------------------------------------------------------------------------------------------------------------------|-----|
| Electrochemical capacitive biosensor                | Interdigitated gold electrode modified with anti- <i>Cryptosporidium</i> monoclonal antibodies (IgG3) | Serial dilution of 250, 200, 150, 100, 50, and 0 <i>C. parvum</i> oocysts in 5 $\mu$ L buffer | Relative capacitance                 | 40 oocysts/5 $\mu$ L (10 oocyst/ $\mu$ L) | <ul style="list-style-type: none"> <li>label-free biosensor.</li> <li>Different water concentrates need to be analysed to understand the applicability.</li> </ul>                                                   | 45  |
| Electrochemical immune sensor                       | Indium tin oxide (ITO) electrode functionalized with antibody                                         | Serial dilution of <i>C. parvum</i> oocysts.                                                  | Differential pulse voltammetry (DPV) | 3 oocysts/mL (0.003oocysts/ $\mu$ L)      | <ul style="list-style-type: none"> <li>Dual labelled gold nanoparticle (antibody and alkaline phosphatase) catalase the substrate p-nitro phenol for DPV signal generation.</li> </ul>                               | 46  |
| Electrochemical ELISA-type screen-printed electrode | Antibody functionalised screen-printed electrode                                                      | Serial dilution of <i>C. parvum</i> oocysts.                                                  | Electrode potential                  | 500 oocysts/mL (0.5 oocysts/ $\mu$ L)     | <ul style="list-style-type: none"> <li>HRP conjugated primary antibody used for detection.</li> <li>HRP oxidases OPD in the presence of H<sub>2</sub>O<sub>2</sub> and increases the electrode potential.</li> </ul> | 47  |



|                                                                         |                                                             |                                                                   |                                                       |                                 |                                                                                                                                                                                                                                                                                                                                                                    |           |
|-------------------------------------------------------------------------|-------------------------------------------------------------|-------------------------------------------------------------------|-------------------------------------------------------|---------------------------------|--------------------------------------------------------------------------------------------------------------------------------------------------------------------------------------------------------------------------------------------------------------------------------------------------------------------------------------------------------------------|-----------|
| <p>Electrochemical impedance spectroscopy in for viability analysis</p> | <p>Interdigitated microelectrode array</p>                  | <p>Serial dilution of purified <i>C. parvum</i> oocysts</p>       | <p>Impedance measurement of suspension of oocysts</p> | <p>10 oocysts/<br/>μL</p>       | <ul style="list-style-type: none"> <li>• Label-free detection.</li> <li>• Buffer conductance is crucial. Low conductance buffer is suitable for oocyst's viability measurement.</li> <li>• 15% lower impedance had been observed for dead oocysts compared to live one.</li> <li>• There is no selectivity test done when other microbes present on the</li> </ul> | <p>48</p> |
| <p>Electrochemical impedimetric biosensor for infectivity analysis</p>  | <p>PDMS well with interdigitated microelectrode arrays.</p> | <p>Purified <i>C. parvum</i> oocysts infection to HCT-8 cells</p> | <p>Impedance measurements</p>                         | <p>1 sporozoite or 1 oocyst</p> | <ul style="list-style-type: none"> <li>• Faster analysis (within 10h) compared to other CC-IFA, CC-PCR or CC-RT-PCR described by di Giovanni <i>et al.</i><sup>18</sup> and Johnson <i>et al.</i><sup>20</sup></li> <li>• Need to evaluate the applicability in environmental samples.</li> </ul>                                                                  | <p>49</p> |

|                                                    |                                                                                                                                                                                    |                                                                                                                                 |                                                                                                             |                                    |                                                                                                                                                                                                                                                                                                      |    |
|----------------------------------------------------|------------------------------------------------------------------------------------------------------------------------------------------------------------------------------------|---------------------------------------------------------------------------------------------------------------------------------|-------------------------------------------------------------------------------------------------------------|------------------------------------|------------------------------------------------------------------------------------------------------------------------------------------------------------------------------------------------------------------------------------------------------------------------------------------------------|----|
| Aptamer-based electrochemical detection of oocysts | Gold nanoparticle-modified screen-printed carbon electrode modified with aptamer for capturing oocyst on the electrode surface.<br>Aptamer: 5'-/5ThioMC6-D/GGCTTCTGGACTACCTATGC-3' | Purified <i>C. parvum</i> oocysts<br>And spiked fruit sample                                                                    | Square wave voltammetry (SWV) of [Fe(CN) <sub>6</sub> ] <sup>4-</sup> /[Fe(CN) <sub>6</sub> ] <sup>3-</sup> | 100 oocysts/30μL (3.33 oocysts/μL) | <ul style="list-style-type: none"> <li>• Aptamer was selected experimentally by SELEX.</li> <li>• Signal on electrode, means signal increases after oocysts binding.</li> </ul>                                                                                                                      | 50 |
| Immuno-dot blot assay                              | Gold nanoparticle modified <i>Cryptosporidium</i> specific antibody and alkaline phosphatase (ALP)                                                                                 | Purified <i>C. parvum</i> oocysts<br><br>5 water sample (10L each)<br><br>Filtrated through 142 mm dia Whatman 42 filter paper. | Color change of chromogenic substance                                                                       | 10 oocysts/mL (0.01oocysts/μL)     | <ul style="list-style-type: none"> <li>• Gold nanoparticle harbors enormous ALP molecules which accelerate the catalysis of a chromogenic substance compared to conventional ALP-conjugated secondary antibody.</li> <li>• Results for water samples were validated by the 18S rRNA gene.</li> </ul> | 51 |
| CRISPR/Cas12a-powered immunosensor                 | Antibody-DNA conjugates (texas red labelled) with CRISPR/Cas12a recognition site.                                                                                                  | <i>C. parvum</i> oocysts<br><br>Mud samples from the water treatment plant spiked with 5 oocysts                                | Fluorescence at 96 well plate fluorescent reader                                                            | 1 oocyst per reaction              | <ul style="list-style-type: none"> <li>• Signal was amplified as each antibody harbors a lot of streptavidin sites where biotinylated DNA probes were attached.</li> </ul>                                                                                                                           | 52 |

|                                                               |                                                                                                                                                                       |                                                                                                                                                   |                                                                  |                                                                                                                           |                                                                                                                                                                                                                                                         |    |
|---------------------------------------------------------------|-----------------------------------------------------------------------------------------------------------------------------------------------------------------------|---------------------------------------------------------------------------------------------------------------------------------------------------|------------------------------------------------------------------|---------------------------------------------------------------------------------------------------------------------------|---------------------------------------------------------------------------------------------------------------------------------------------------------------------------------------------------------------------------------------------------------|----|
| CRISPR/Cas12a-based lateral flow strip (LFS)                  | RPA of the gp60 gene followed by CRISPR/Cas12a trans cleavage.                                                                                                        | Purified <i>C. parvum</i> IIdA19G1                                                                                                                | Strong Fluorescence readouts observed naked eye under blue light | 10 oocysts/mL (0.01 oocysts/ $\mu$ L)<br>This has been calculated from the response of the signal of serially diluted DNA | <ul style="list-style-type: none"> <li>Amplification through RPA before CRISPR/Cas12a cleavage activity has made this assay highly sensitive.</li> </ul>                                                                                                | 53 |
| Microfluidic device with SUS micromesh                        | 100(10x10) microcavities (diameter 2.7 $\mu$ m) on a stainless-steel plate to capture <i>Cryptosporidium</i> oocysts, followed by staining with fluorescent antibody. | Purified <i>C. parvum</i> oocysts spiked in tap water                                                                                             | Fluorescent microscopy                                           | 10 oocysts/mL (0.01 oocysts/ $\mu$ L)                                                                                     | <ul style="list-style-type: none"> <li>93.1% recovery efficiency with 60 minutes detection time, could be a promising platform for post-concentration analysis of water samples when considering other types of water samples with matrices.</li> </ul> | 54 |
| Microfluidic-based multi-angle laser scattering (MALS) system | Distinctive scattering                                                                                                                                                | <i>C. parvum</i> , <i>G. lamblia</i> , <i>E. coli</i> Polystyrene microsphere mixture (total 200 organisms with PS microsphere) in reagent water. | Support-vector-machine (SVM) algorithm                           | NA                                                                                                                        | <ul style="list-style-type: none"> <li>Rapid and label-free detection.</li> <li>98% percent accuracy in detecting <i>C. parvum</i>.</li> </ul>                                                                                                          | 55 |

|                                                                                               |                                                                                                                                                                        |                                                                            |                                                                                                           |                                 |                                                                                                                                            |    |
|-----------------------------------------------------------------------------------------------|------------------------------------------------------------------------------------------------------------------------------------------------------------------------|----------------------------------------------------------------------------|-----------------------------------------------------------------------------------------------------------|---------------------------------|--------------------------------------------------------------------------------------------------------------------------------------------|----|
| Microfluidic diffraction phase microscopy                                                     | Quantitative pixel-wise phase maps of individual oocyst                                                                                                                | <i>Cryptosporidium</i> oocysts suspension in PBS                           | Imaging microscopy                                                                                        | NA                              | <ul style="list-style-type: none"> <li>• Rapid and label-free detection</li> </ul>                                                         | 56 |
| Optical microfluidic biosensors                                                               | Immunoagglutinated microbeads with COWP protein                                                                                                                        | <i>C. parvum</i> oocysts suspension in PBS<br><br>Spiked sump water sample | Mie scattering intensity                                                                                  | 1–10 oocysts/mL (0.001-0.01/μL) | <ul style="list-style-type: none"> <li>• Very rapid (10 minutes analysis time)</li> </ul>                                                  | 57 |
| mRNA isolation and amplification by on-chip microfluidic device followed by LFA for detection | Microfluidic channel PAMAM dendrimers, which increase the binding of oligo(dT) <sub>25</sub> to capture mRNA. Then on-chip NASBA was performed for <i>hsp 70</i> mRNA. | Purified <i>C. parvum</i> oocysts.                                         | After hybridisation with NASBA product Reporter probe-tagged liposomes produce color on the LFA test line | 30 oocysts per reaction         | <ul style="list-style-type: none"> <li>• On-chip mRNA isolation increased the mRNA capture, which in turn sensitized the NASBA.</li> </ul> | 58 |

## References

- 1 T. Wohlsen, J. Bates, B. Gray and M. Katouli, Evaluation of Five Membrane Filtration Methods for Recovery of *Cryptosporidium* and *Giardia* Isolates from Water Samples. *Appl Environ Microbiol*, 2004, **70**, 2318–2322.
- 2 G. Stanfield, E. Carrington, F. Albinet, B. Compagnon, N. Dumoutier, B. Hamsch, A. Lorthioy, G. Medema, H. Pezoldt, M. R. de Roubin, A. de Lohman and T. Whitmore, An optimised and standardised test to determine the presence of the protozoa *Cryptosporidium* and *Giardia* in water, *Water Sci Technol*, 2000, **41**, 103–110.
- 3 H. Karim, S. Sylvain, L. Laurence, H. Lucien and C. Henry-Michel, Comparison of three methods to concentrate *Giardia* cysts and *Cryptosporidium* oocysts from surface and drinking waters, *Water Sci Technol*, 2010, **62**, 196–201.
- 4 Z. Matheson, T. M. Hargy, R. M. McCuin, J. L. Clancy and C. R. Fricker, An evaluation of the Gelman Envirochek® capsule for the simultaneous concentration of *Cryptosporidium* and *Giardia* from water, *J Appl Microbiol*, 1998, **85**, 755–761.
- 5 T. Oda, M. Sakagami, H. Ito, H. Yano, S. K. Rai, M. Kawabata and S. Uga, Size selective continuous flow filtration method for detection of *Cryptosporidium* and *Giardia*, *Water Res*, 2000, **34**, 4477–4481.
- 6 B. Mull and V. R. Hill, Recovery of diverse microbes in high turbidity surface water samples using dead-end ultrafiltration, *J Microbiol Methods*, 2012, **91**, 429–433.
- 7 C. M. Smith and V. R. Hill, Dead-end hollow-fiber ultrafiltration for recovery of diverse microbes from water, *Appl Environ Microbiol*, 2009, **75**, 5284–5289.
- 8 M. E. Warkiani, C. P. Lou, H. B. Liu and H. Q. Gong, A high-flux isopore micro-fabricated membrane for effective concentration and recovering of waterborne pathogens, *Biomed Microdevices*, 2012, **14**, 669–677.
- 9 N. M. M. Pires and T. Dong, Recovery of *Cryptosporidium* and *Giardia* organisms from surface water by counter-flow refining microfiltration, *Environ Technol*, 2013, **34**, 2541–2551.
- 10 U. Zuckerman, R. Armon, S. Tzipori and D. Gold, Evaluation of a portable differential continuous flow centrifuge for concentration of *Cryptosporidium* oocysts and *Giardia* cysts from water, *J Appl Microbiol*, 1999, **86**, 955–961.
- 11 G. Vesey, N. Ashbolt, E. J. Fricker, D. Deere, K. L. Williams, D. A. Veal and M. Dorsch, The use of a ribosomal RNA targeted oligonucleotide probe for fluorescent labelling of viable *Cryptosporidium parvum* oocysts, *J Appl Microbiol*, 1998, **85**, 429–440.
- 12 R. I. Amann, B. J. Binder, R. J. Olson, S. W. Chisholm, R. Devereux and D. A. Stahl, Combination of 16S rRNA-targeted oligonucleotide probes with flow cytometry for analyzing mixed microbial populations, *Appl Environ Microbiol*, 1990, **56**, 1919–1925.

- 13 D. Deere, G. Vesey, M. Milner, K. Williams, N. Ashbolt and D. Veal, Rapid method for fluorescent in situ ribosomal RNA labelling of *Cryptosporidium parvum*, *J Appl Microbiol*, 1998, **85**, 807–818.
- 14 D. Deere, G. Vesey, N. Ashbolt, K. A. Davies, K. L. Williams and D. Veal, Evaluation of fluorochromes for flow cytometric detection of *Cryptosporidium parvum* oocysts labelled by fluorescent in situ hybridization, *Lett Appl Microbiol*, 1998, **27**, 352–356.
- 15 A. Alagappan, P. L. Bergquist and B. C. Ferrari, Development of a two-color fluorescence in situ hybridization technique for species-level identification of human-infectious *Cryptosporidium* spp., *Appl Environ Microbiol*, 2009, **75**, 5996–5998.
- 16 A. Alagappan, N. A. Tujula, M. Power, C. M. Ferguson, P. L. Bergquist and B. C. Ferrari, Development of fluorescent in situ hybridisation for *Cryptosporidium* detection reveals zoonotic and anthroponotic transmission of sporadic cryptosporidiosis in Sydney, *J Microbiol Methods*, 2008, **75**, 535–539.
- 17 P. A. Rochelle, D. M. Ferguson, T. J. Handojo, R. de Leon, M. H. Stewart and R. L. Wolfe, An assay combining cell culture with reverse transcriptase PCR to detect and determine the infectivity of waterborne *Cryptosporidium parvum*. *Appl Environ Microbiol*, 1997, **63**, 2029–2037.
- 18 G. D. di Giovanni, F. H. Hashemi, N. J. Shaw, F. A. Abrams, M. W. Lechevallier and M. Abbaszadegan, Detection of Infectious *Cryptosporidium parvum* Oocysts in Surface and Filter Backwash Water Samples by Immunomagnetic Separation and Integrated Cell Culture-PCR, *Appl Environ Microbiol*, 1999, **65**, 3427–32.
- 19 M. W. LeChevallier, G. D. Di Giovanni, J. L. Clancy, Z. Bukhari, S. Bukhari, J. S. Rosen, J. Sobrinho and M. M. Frey, Comparison of method 1623 and cell culture-PCR for detection of *Cryptosporidium* spp. in source waters, *Appl Environ Microbiol*, 2003, **69**, 971–979.
- 20 A. M. Johnson, G. D. di Giovanni and P. A. Rochelle, Comparison of assays for sensitive and reproducible detection of cell culture-infectious *Cryptosporidium parvum* and *Cryptosporidium hominis* in drinking water, *Appl Environ Microbiol*, 2012, **78**, 156–162.
- 21 L. Xiao, U. M. Morgan, J. Limor, A. Escalante, M. Arrowood, W. Shulaw, R. C. A. Thompson, R. Fayer and A. A. Lal, Genetic Diversity within *Cryptosporidium parvum* and Related *Cryptosporidium* Species, *Appl Environ Microbiol*, 1999, **65**, 3386–3391.
- 22 J. Jiang, K. A. Alderisio, A. Singh and L. Xiao, Development of procedures for direct extraction of *Cryptosporidium* DNA from water concentrates and for relief of PCR inhibitors, *Appl Environ Microbiol*, 2005, **71**, 1135–1141.
- 23 L. Xiao, L. Escalante, C. Yang, I. Sulaiman, A. A. Escalante, R. J. Montali, R. Fayer and A. A. Lal, Phylogenetic analysis of *Cryptosporidium* parasites based on the small-subunit rRNA gene locus, *Appl Environ Microbiol*, 1999, **65**, 1578–1583.
- 24 F. M. Ulloa-Stanojlović, B. Aguiar, L. M. Jara, M. I. Z. Sato, J. A. Guerrero, E. Hachich, G. R. Matté, M. Dropa, M. H. Matté and R. S. de Araújo, Occurrence of

- Giardia intestinalis* and *Cryptosporidium* sp. in wastewater samples from São Paulo State, Brazil, and Lima, Peru. *Environ Sci Pollut Res*, 2016, **23**, 22197–22205.
- 25 C. Kaucner and T. Stinear, Sensitive and rapid detection of viable *Giardia* cysts and *Cryptosporidium parvum* oocysts in large-volume water samples with wound fiberglass cartridge filters and reverse transcription-PCR, *Appl Environ Microbiol*, 1998, **64**, 1743–1749.
- 26 T. Stinear, A. Matusan, K. Hines and M. Sandery, Detection of a single viable *Cryptosporidium parvum* oocyst in environmental water concentrates by reverse transcription-PCR, *Appl Environ Microbiol*, 1996, **62**, 3385–3390.
- 27 P. T. Monis and C. P. Saint, Development of a nested-PCR assay for the detection of *cryptosporidium parvum* in finished water, *Water Res*, 2001, **35**, 1641–1648.
- 28 J. B. Burnet, L. Ogorzaly, A. Tissier, C. Penny and H. M. Cauchie, Novel quantitative TaqMan real-time PCR assays for detection of *Cryptosporidium* at the genus level and genotyping of major human and cattle-infecting species, *J Appl Microbiol*, 2013, **114**, 1211–1222.
- 29 R. A. Guy, P. Payment, U. J. Krull and P. A. Horgen, Real-time PCR for quantification of *Giardia* and *Cryptosporidium* in environmental water samples and sewage, *Appl Environ Microbiol*, 2003, **69**, 5178–5185.
- 30 S. J. Hadfield, G. Robinson, K. Elwin and R. M. Chalmers, Detection and differentiation of *Cryptosporidium* spp. in human clinical samples by use of real-time PCR, *J Clin Microbiol*, 2011, **49**, 918–924.
- 31 N. Li, N. F. Neumann, N. Ruecker, K. A. Alderisio, G. D. Sturbaum, E. N. Villegas, R. Chalmers, P. Monis, Y. Feng and L. Xiao, Development and evaluation of three real-time PCR assays for genotyping and source tracking *Cryptosporidium* spp. in water, *Appl Environ Microbiol*, 2015, **81**, 5845–5854.
- 32 U. M. Morgan, C. C. Constantine, D. A. Forbes and R. C. A. Thompson, Differentiation between human and animal isolates of *Cryptosporidium parvum* using rDNA sequencing and direct PCR analysis, *J Parasitol*, 1997, **83**, 825–830.
- 33 B. J. King, A. R. Keegan, P. T. Monis and C. P. Saint, Environmental temperature controls *Cryptosporidium* oocyst metabolic rate and associated retention of infectivity, *Appl Environ Microbiol*, 2005, **71**, 3848–3857.
- 34 R. Yang, A. Papparini, P. Monis and U. Ryan, Comparison of next-generation droplet digital PCR (ddPCR) with quantitative PCR (qPCR) for enumeration of *Cryptosporidium* oocysts in faecal samples, *Int J Parasitol*, 2014, **44**, 1105–1113.
- 35 P. Karanis, O. Thekisoe, K. Kiouptsi, J. Ongerth, I. Igarashi and N. Inoue, Development and preliminary evaluation of a loop-mediated isothermal amplification procedure for sensitive detection of *Cryptosporidium* oocysts in fecal and water samples, *Appl Environ Microbiol*, 2007, **73**, 5660–5662
- 36 M. A. Bakheit, D. Torra, L. A. Palomino, O. M. M. Thekisoe, P. A. Mbatia, J. Ongerth and P. Karanis, Sensitive and specific detection of *Cryptosporidium* species in PCR-

- negative samples by loop-mediated isothermal DNA amplification and confirmation of generated LAMP products by sequencing, *Vet Parasitol*, 2008, **158**, 11–22.
- 37 L. Xiao, K. Alderisio, J. Limor, M. Royer and A. A. Lal, *Identification of Species and Sources of Cryptosporidium Oocysts in Storm Waters with a Small-Subunit rRNA-Based Diagnostic and Genotyping Tool*, *Appl Environ Microbiol*, 2000, **66**, 5492–5498
- 38 M. R. Mahmoudi, B. Kazemi, A. Mohammadiha, A. Mirzaei and P. Karanis, Detection of *Cryptosporidium* and *Giardia* (oo)cysts by IFA, PCR and LAMP in surface water from Rasht, Iran, *Trans R Soc Trop Med Hyg*, 2013, **107**, 511–517.
- 39 Z. Koloren, I. Sotiriadou and P. Karanis, Investigations and comparative detection of *Cryptosporidium* species by microscopy, nested PCR and LAMP in water supplies of ordu, middle Black Sea, Turkey, *Ann Trop Med Parasitol*, 2011, **105**, 607–615.
- 40 C. Gallas-Lindemann, I. Sotiriadou, J. Plutzer, M. J. Noack, M. R. Mahmoudi and P. Karanis, *Giardia* and *Cryptosporidium* spp. dissemination during wastewater treatment and comparative detection via immunofluorescence assay (IFA), nested polymerase chain reaction (nested PCR) and loop mediated isothermal amplification (LAMP). *Acta Trop*, 2016, **158**, 43–51.
- 41 B. K. Hønsvall and L. J. Robertson, Real-time nucleic acid sequence-based amplification (NASBA) assay targeting MIC1 for detection of *Cryptosporidium parvum* and *Cryptosporidium hominis* oocysts, *Exp Parasitol*, 2017, **172**, 61–67.
- 42 I. M. Sulaiman, P. R. Hira, L. Zhou, F. M. Al-Ali, F. A. Al-Shelahi, H. M. Shweiki, J. Iqbal, N. Khalid and L. Xiao, Unique endemicity of cryptosporidiosis in children in Kuwait. *J Clin Microbiol*, 2005, **43**, 2805–2809.
- 43 K. Braima, A. Zahedi, S. Egan, J. Austen, L. Xiao, Y. Feng, B. Witham, N. Pingault, S. Perera, C. Oskam, S. Reid and U. Ryan, Molecular analysis of cryptosporidiosis cases in Western Australia in 2019 and 2020 supports the occurrence of two swimming pool associated outbreaks and reveals the emergence of a rare *C. hominis* IbA12G3 subtype, *Infect Genet Evol*, 2021, **92**, 104859.
- 44 A. Zahedi, T. L. Greay, A. Paparini, K. L. Linge, C. A. Joll and U. M. Ryan, Identification of eukaryotic microorganisms with 18S rRNA next-generation sequencing in wastewater treatment plants, with a more targeted NGS approach required for *Cryptosporidium* detection, *Water Res*, 2019, **158**, 301–312.
- 45 G. Luka, E. Samiei, S. Dehghani, T. Johnson, H. Najjaran and M. Hoorfar, *Label-free capacitive biosensor for detection of Cryptosporidium*. *Sensors*, 2019, **19**, 258.
- 46 C. Thiruppathiraja, V. Saroja, S. Kamatchiammal, P. Adaikkappan and M. Alagar, Development of electrochemical based sandwich enzyme linked immunosensor for *Cryptosporidium parvum* detection in drinking water, *J Environ Monit*, 2011, **13**, 2782–2787.



- 47 O. Laczka, L. Skillman, W. G. Ditcham, B. Hamdorf, D. K. Y. Wong, P. Bergquist and A. Sunna, Application of an ELISA-type screen printed electrode-based potentiometric assay to the detection of *Cryptosporidium parvum* oocysts, *J Microbiol Methods*, 2013, **95**, 182–185.
- 48 T. Houssin, J. Follet, A. Follet, E. Dei-Cas and V. Senez, Label-free analysis of water-polluting parasite by electrochemical impedance spectroscopy, *Biosens Bioelectron*, 2010, **25**, 1122–1129.
- 49 A. Dibao-Dina, J. Follet, M. Ibrahim, A. Vlandas and V. Senez, Electrical impedance sensor for quantitative monitoring of infection processes on HCT-8 cells by the waterborne parasite *Cryptosporidium*, *Biosens Bioelectron*, 2015, **66**, 69–76.
- 50 A. Iqbal, M. Labib, D. Muharemagic, S. Sattar, B. R. Dixon and M. v. Berezovski, Detection of *Cryptosporidium parvum* oocysts on fresh produce using DNA aptamers, *PLoS One*, 2015, **10**, e0137455.
- 51 C. Thiruppathiraja, S. Kamatchiammal, P. Adaikkappan and M. Alagar, An advanced dual labeled gold nanoparticles probe to detect *Cryptosporidium parvum* using rapid immuno-dot blot assay, *Biosens Bioelectron*, 2011, **26**, 4624–4627.
- 52 Y. Li, F. Deng, T. Hall, G. Vesey and E. M. Goldys, CRISPR/Cas12a-powered immunosensor suitable for ultra-sensitive whole *Cryptosporidium* oocyst detection from water samples using a plate reader *Water Res*, 2021, **203**, 117553.
- 53 F. Yu, K. Zhang, Y. Wang, D. Li, Z. Cui, J. Huang, S. Zhang, X. Li and L. Zhang, CRISPR/Cas12a-based on-site diagnostics of *Cryptosporidium parvum* IId-subtype-family from human and cattle fecal samples, *Parasit Vectors*, 2021, **14**, 1-10.
- 54 T. Taguchi, A. Arakaki, H. Takeyama, S. Haraguchi, M. Yoshino, M. Kaneko, Y. Ishimori and T. Matsunaga, Detection of *Cryptosporidium parvum* oocysts using a microfluidic device equipped with the SUS micromesh and FITC-labeled antibody, *Biotechnol Bioeng*, 2007, **96**, 272–280.
- 55 W. Huang, L. Yang, L. Lei and F. Li, Label-free detection and identification of waterborne parasites using a microfluidic multi-angle laser scattering system *Opt Commun*, 2017, **400**, 25–29.
- 56 X. Gu, L. Lei, Y. Sun, X. Si, M. Wang, F. Li, G. Yang, L. Yang, G. Pan and W. Huang, Microfluidic diffraction phase microscopy for high-throughput, artifact-free quantitative phase imaging and identification of waterborne parasites, *Opt Laser Technol*, 2019, **120**, 105681.
- 57 S. v. Angus, H. J. Kwon and J. Y. Yoon, Field-deployable and near-real-time optical microfluidic biosensors for single-oocyst-level detection of *Cryptosporidium parvum* from field water samples, *J Environ Monit*, 2012, **14**, 3295–3304.
- 58 S. J. Reinholt, A. Behrent, C. Greene, A. Kalfe and A. J. Baeumner, Isolation and amplification of mRNA within a simple microfluidic lab on a chip, *Anal Chem*, 2014, **86**, 849–856.
